# Supplementary material for: MicroRNA-1911-3p targets mEAK-7 to suppress mTOR signaling in human lung cancer cells
Source: PubMed Central journal article supplement (PMC7753913; doi:10.1016/j.heliyon.2020.e05734), 2020-12-19
Supplement: mmc1.pdf [file mmc1.pdf]

**Figure S1**

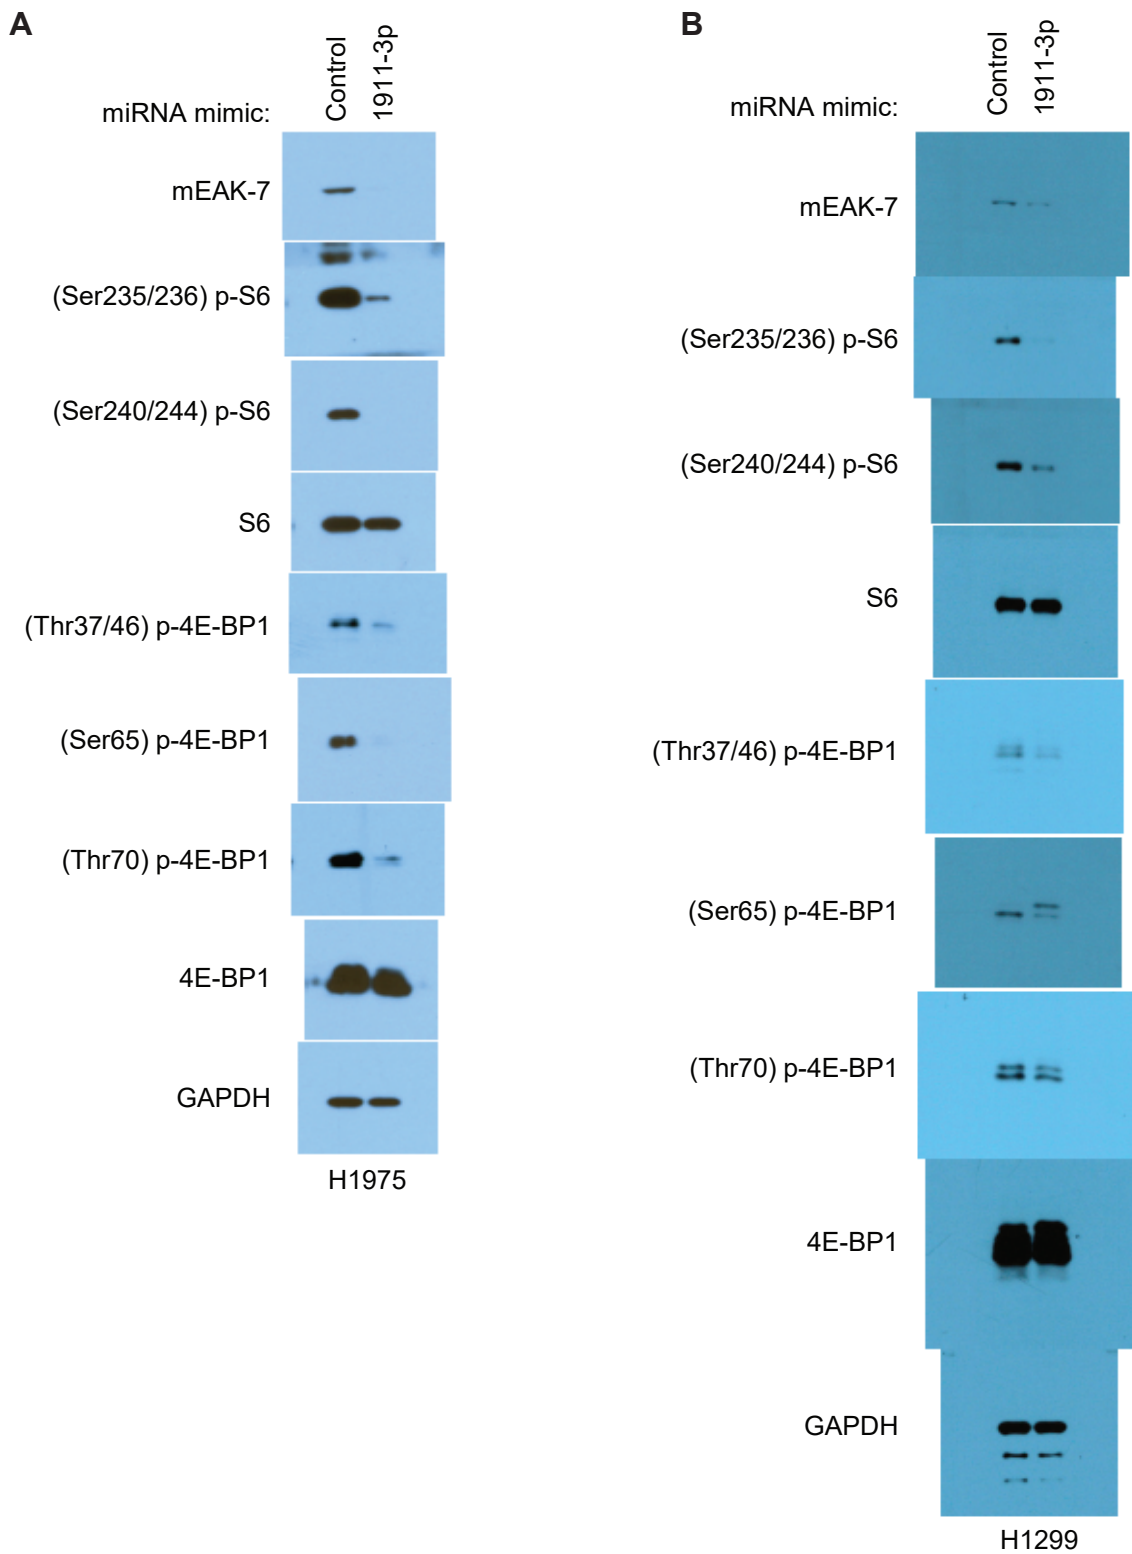

**Figure S1.** miR-1911-3p is an effector for mEAK-7 and mTOR signaling in human lung cancer cells.

H1975 (A) and H1299 (B) cells were transfected with miR-1911-3p mimic for 48 hours to evaluate mEAK-7 and mTOR signaling. GAPDH was used as a loading control.

**Figure S2**

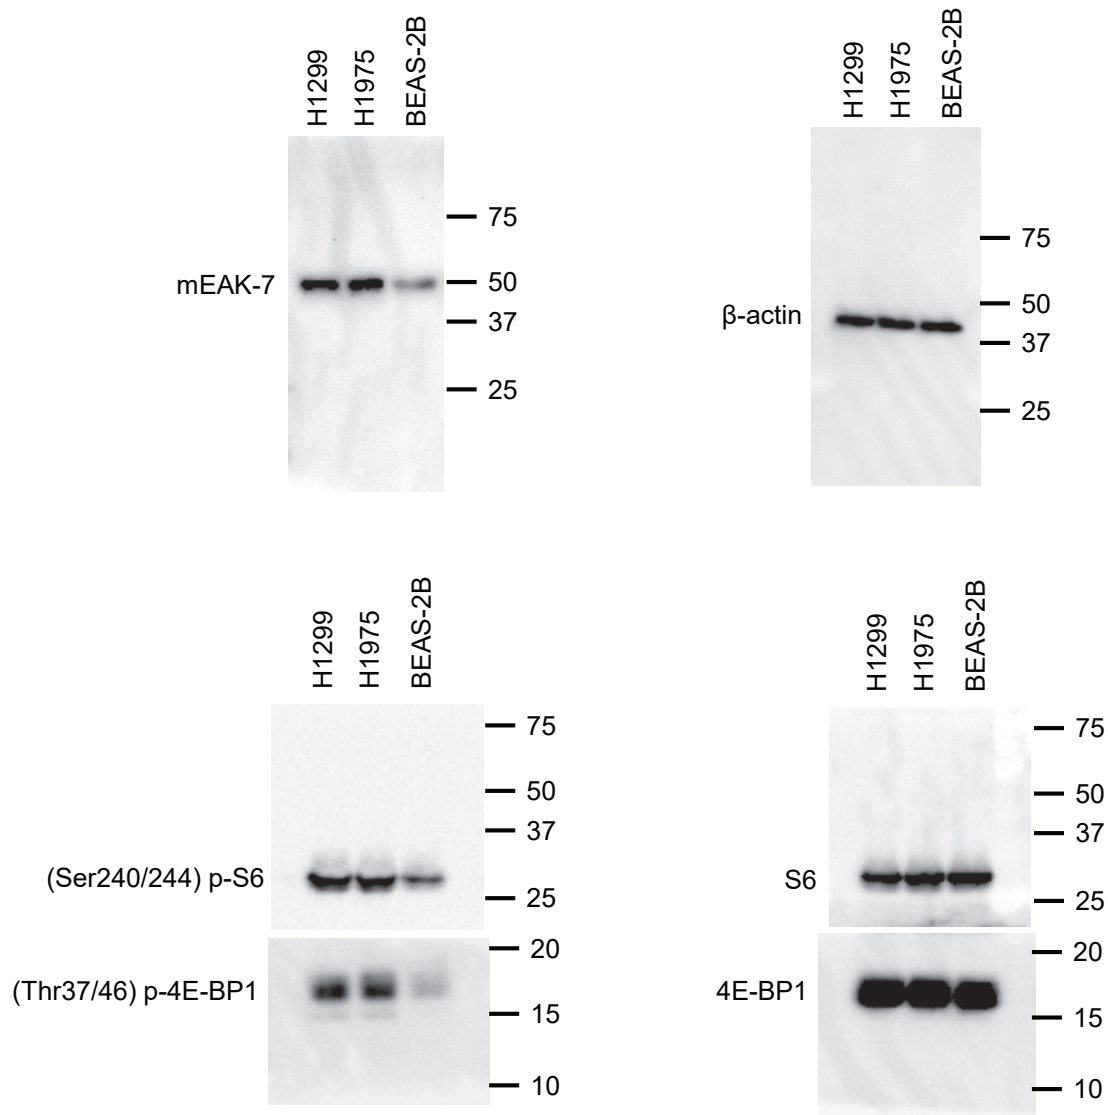

**Figure S2.** miR-1911-3p is an effector for mEAK-7 and mTOR signaling in human lung cancer cells. Expression of mEAK-7 and mTOR signaling in H1299, H1975, and BEAS-2B cells was analyzed by Western blotting.  $\beta$ -actin was used as a loading control.
